# Supplementary material for: Insights into divalent cation regulation and G13-coupling of orphan receptor GPR35
Source: Springer Nature journal article supplement (doi:10.1038/s41421-022-00499-8), 2022-12-21
Supplement: MOESM1 [file 41421_2022_499_MOESM1_ESM.pdf]

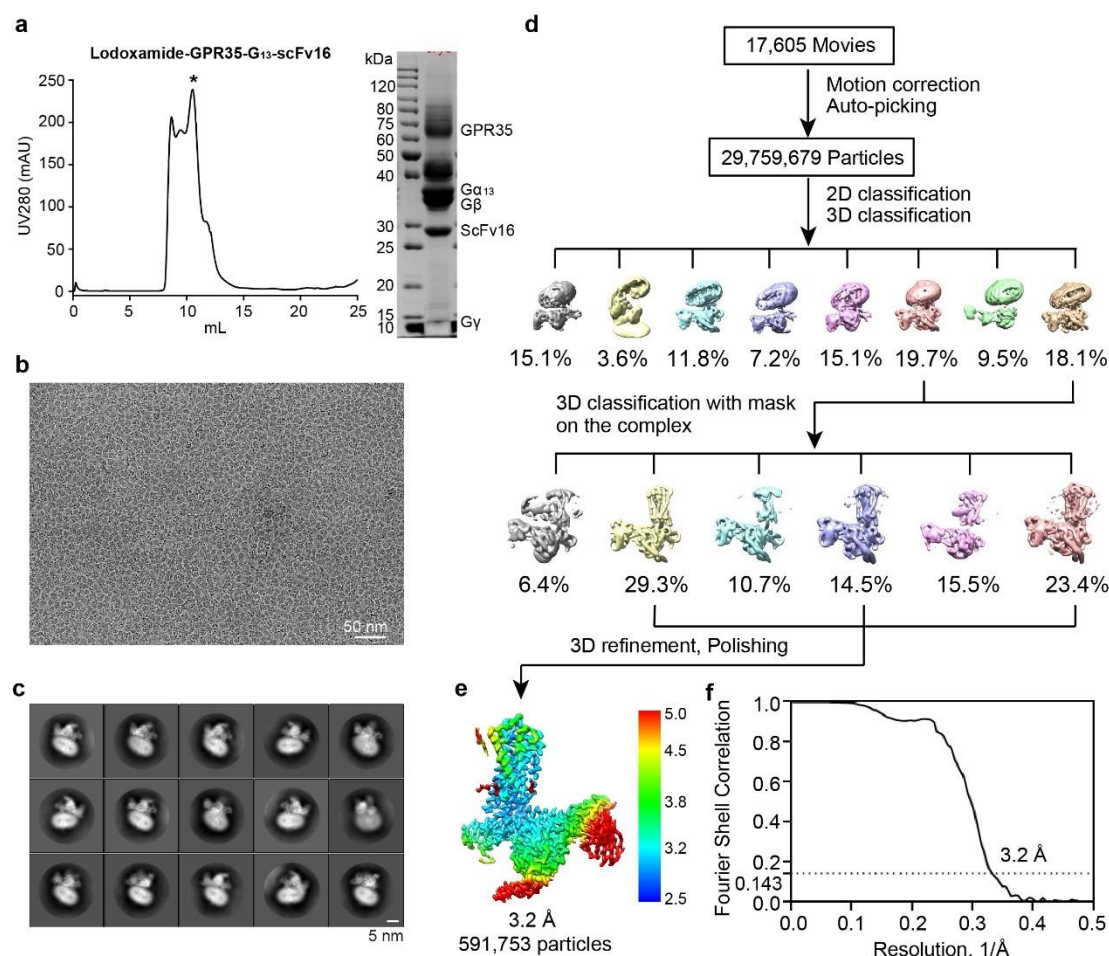

**Fig. S1 The lodoxamide-GPR35-G<sub>13</sub>-scFv16 complex purification and cryo-EM data processing.**

**a** Representative elution profile of the lodoxamide-GPR35-G<sub>13</sub>-scFv16 complex and SDS-PAGE of the size-exclusion chromatography peak. **b, c** Representative cryo-EM micrographs of the lodoxamide-GPR35-G<sub>13</sub>-scFv16 complex (**b**, scale bar: 50 nm) and 2D class averages (**c**, scale bar: 5 nm). **d** Flow chart of cryo-EM data processing of the lodoxamide-GPR35-G<sub>13</sub>-scFv16 complex. **e** 3D density map of the GPR35 complex colored according to local resolution (Å). **f** Gold-standard Fourier Shell Correlation (FSC) curve of the global non-uniform refinement of the complex.

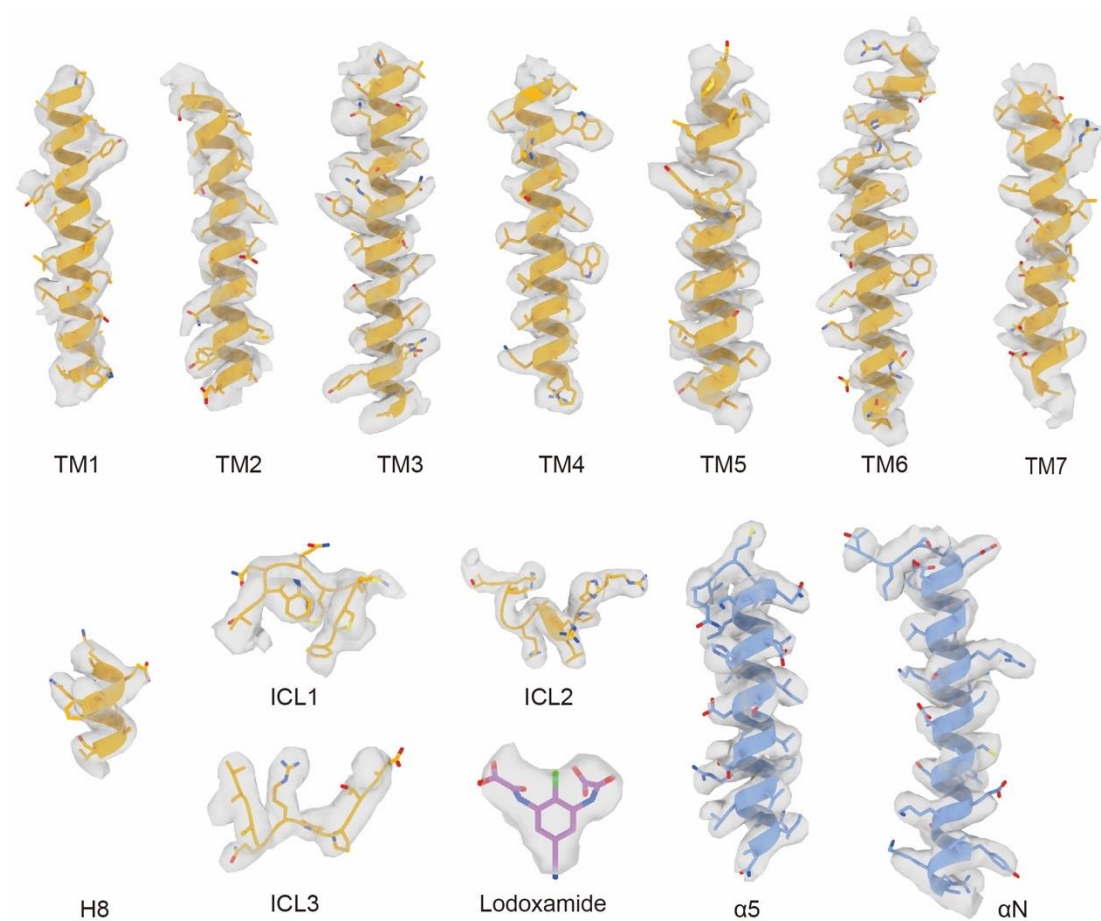

**Fig. S2 Representative EM density and coordinate of the lodoxamide-GPR35-G<sub>13</sub>-scFv16 complex.**

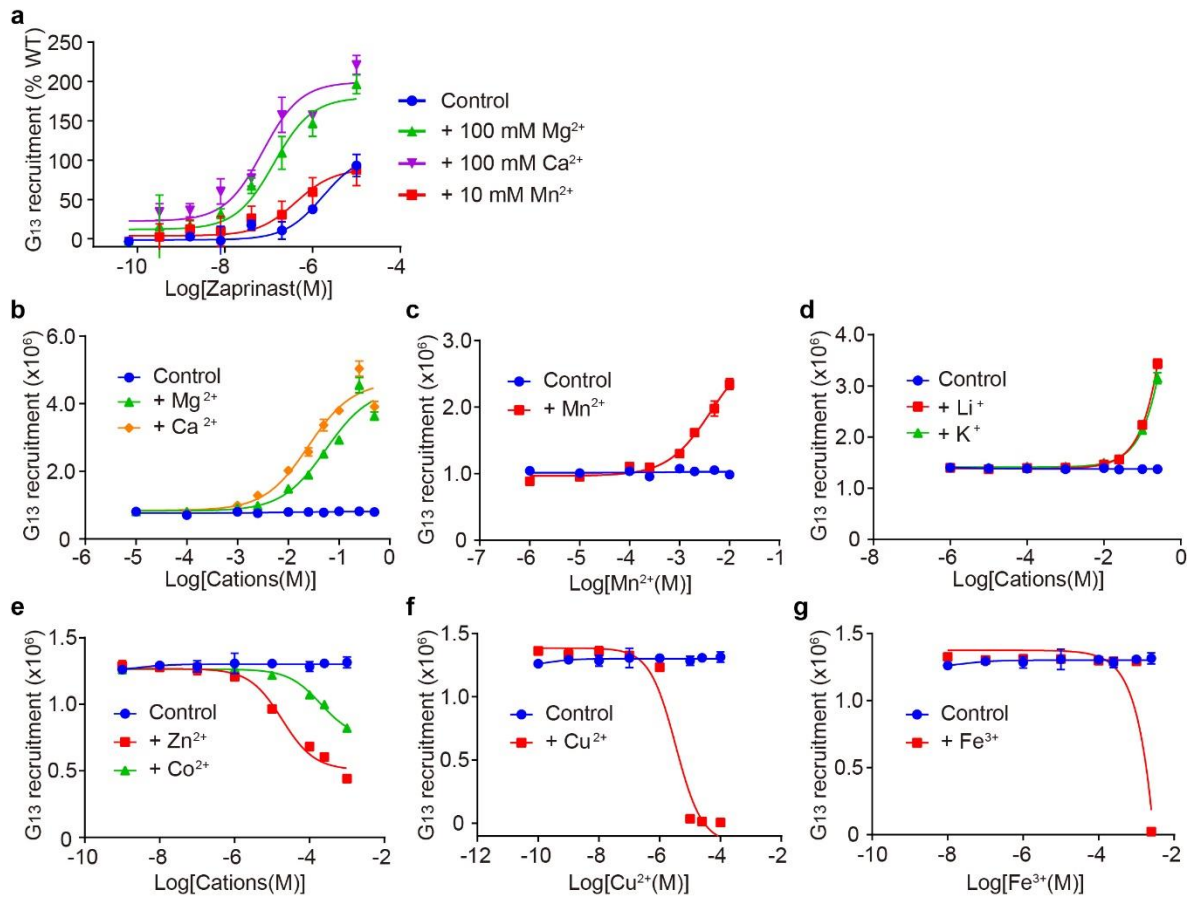

**Fig. S3 Allosteric agonism effects of cations on zaprinast for GPR35 and their effects on the activity of apo GPR35.**

**a** Allosteric agonism effects of divalent cations ( $Mg^{2+}$ ,  $Ca^{2+}$ , and  $Mn^{2+}$ ) on zaprinast for GPR35.

**b-g** Effects of cations on apo GPR35 activity, including  $Mg^{2+}$ ,  $Ca^{2+}$  (**b**),  $Mn^{2+}$  (**c**),  $Li^+$ ,  $K^+$  (**d**),  $Zn^{2+}$ ,  $Co^{2+}$  (**e**),  $Cu^{2+}$  (**f**), and  $Fe^{3+}$  (**g**). The GPR35 pretreated with EDTA and without the addition of any cations is defined as control.

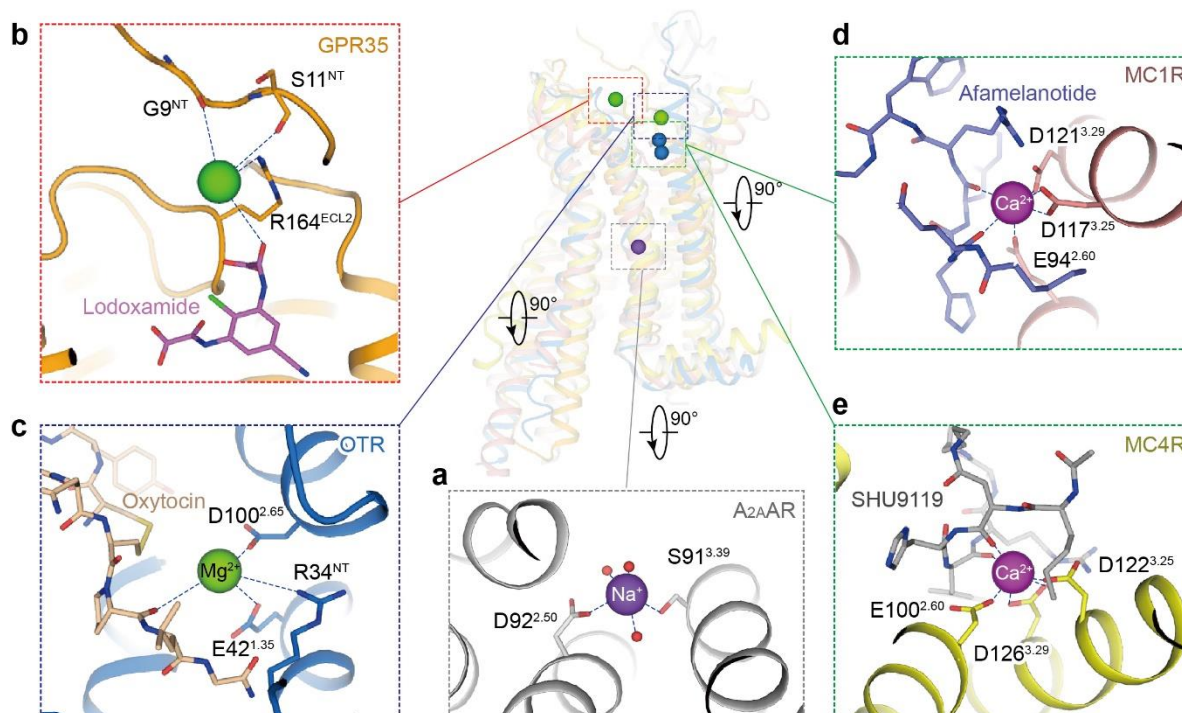

**Fig. S4 Comparison of cation coordination sites in class A GPCRs.**

**a**  $\text{Na}^+$  coordination site buried in the TMD helices of  $\text{A}_{2\text{A}}\text{AR}$  (PDB: 4EII). The  $\text{Na}^+$  site is highly conserved across class A GPCRs. **b** The divalent cation binding site in GPR35. **c**  $\text{Mg}^{2+}$  coordination site in oxytocin bound oxytocin receptor (OTR, PDB: 7RYC). **d**  $\text{Ca}^{2+}$  coordination site in afamelanotide bound melanocortin receptor 1 (MC1R, PDB: 7F4H). **e**  $\text{Ca}^{2+}$  coordination site in SHU9119 bound melanocortin receptor 4 (MC4R, PDB: 6W25). Polar interactions between cations and their coordinate residues are indicated by blue dashed lines.

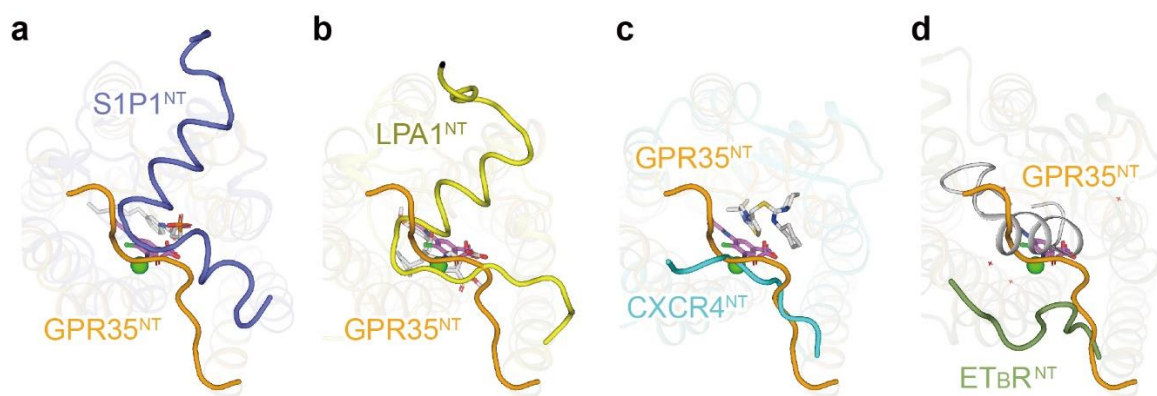

**Fig. S5 Structural comparison of N-terminus in representative class A GPCRs.**

Structural comparison of N-terminus (NT) of GPR35 with that of sphingosine-1-phosphate receptor subtype 1 (S1P1, PDB: 3V2Y, **a**), lysophospholipid receptor 1 (LPA1, PDB: 4Z34, **b**), C-X-C chemokine receptor type 4 (CXCR4, PDB: 3ODU, **c**), and endothelin B receptor (ETBR, PDB: 5GLH, **d**).



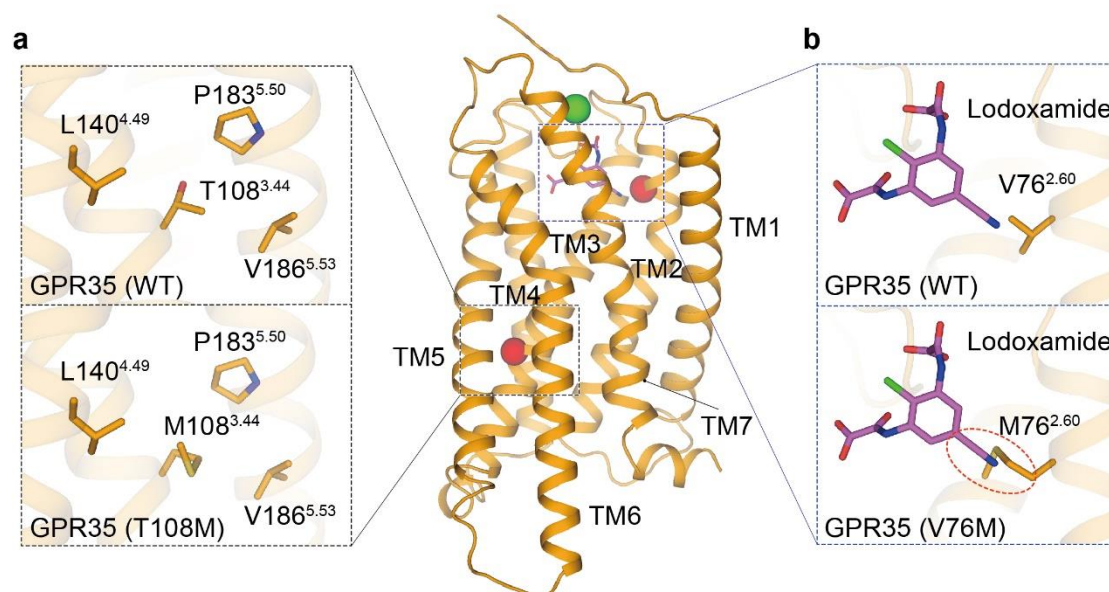

**Fig. S6 Disease-associated mutations on GPR35.**

Two disease-associated mutations T108<sup>3.44</sup>M (a) and V76<sup>2.60</sup>M (b) are shown as two red spheres (middle panel). Upper panel, WT GPR35; bottom panel, two disease-associated GPR35 mutants. The potential steric hindrance between lodoxamide and M76<sup>2.60</sup> is highlighted in a red circle.

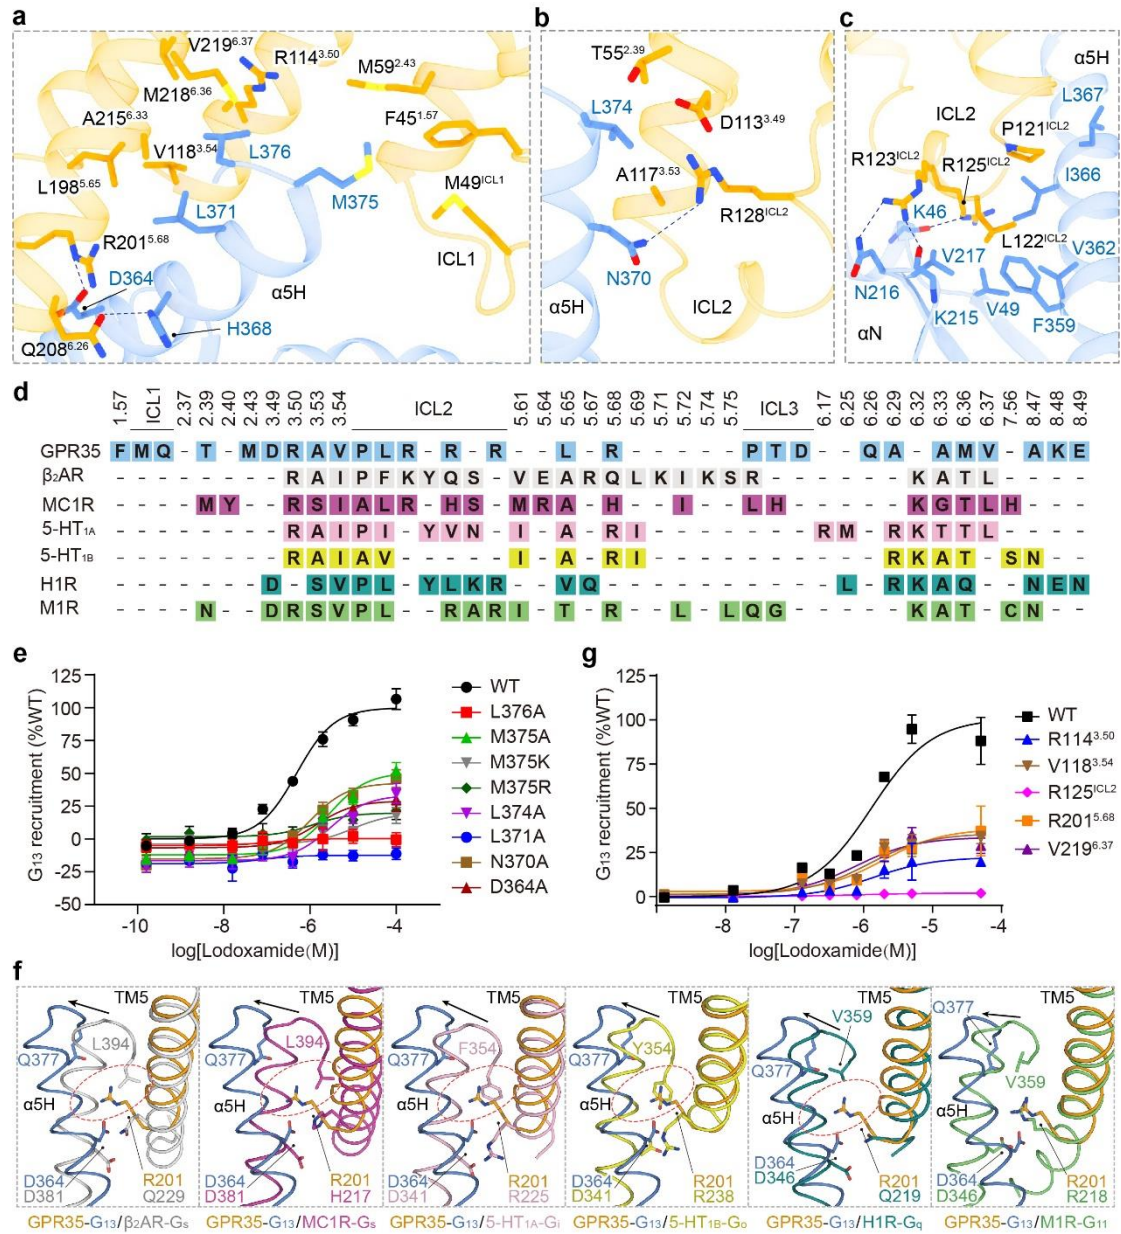

**Fig. S7  $G_{13}$ -coupling of GPR35.**

**a-c** Detail interactions between the cytoplasmic cavity of receptor helices and  $\alpha 5$  helix of the  $G_{\alpha 13}$  subunit (**a**, **b**), and a hydrophobic interface between ICL2 of the receptor and  $\alpha N$  and  $\alpha 5$  of the  $G_{\alpha 13}$  subunit (**c**). **d** Comparison of the GPR35- $G_{13}$  coupling profile with that of GPCRs coupled to other G protein subtypes. **e** Concentration-response curves of lodoxamide on  $G_{\alpha 13}$  mutants at GPR35- $G_{13}$  interfaces. **f** The interactions between D (-14,  $\alpha 5$  helix numbering start with -1 from the terminal residue) of  $\alpha 5$  helix of  $G_{\alpha}$  subunits and R/Q/H at position 5.68 of receptors. The potential steric hindrance between R/Q/H<sup>5.68</sup> and the C-terminal residue (-1) and entire  $\alpha 5$  helices are highlighted in red dashed circles. The movement of the C-terminus of  $\alpha 5$  helix of  $G_{\alpha}$  subunit for GPR35- $G_{13}$  complex compared to other GPCR-G protein complexes are shown as black arrows. **g** Concentration-response curves of lodoxamide on GPR35 mutants at GPR35- $G_{13}$  interfaces.

**Table S1 Cryo-EM data collection, model refinement, and validation statistics**

| Lodoxamide-GPR35-G <sub>13</sub> -scFv16 complex    |                    |
|-----------------------------------------------------|--------------------|
| <b>Data collection and processing</b>               |                    |
| Magnification                                       | 81,000             |
| Voltage (kV)                                        | 300                |
| Electron exposure (e <sup>-</sup> /Å <sup>2</sup> ) | 50                 |
| Defocus range (μm)                                  | -1.0~-2.0          |
| Pixel size (Å)                                      | 1.04               |
| Symmetry imposed                                    | C1                 |
| Initial particle projections (no.)                  | 32,292,277         |
| Final particle projections (no.)                    | 591246             |
| Map resolution (Å)                                  | 3.20               |
| Map resolution range (Å)                            | 2.7-4.0            |
| FSC threshold                                       | 0.143              |
| <b>Model Refinement</b>                             |                    |
| Refinement package                                  | PHENIX-1.17.1-3660 |
| Real or reciprocal space                            | Real space         |
| Model-Map CC (mask)                                 | 0.74               |
| Model resolution (Å)                                | 3.3                |
| FSC threshold                                       | 0.5                |
| B factors (Å <sup>2</sup> , mean value)             |                    |
| Protein residues                                    | 65.2               |
| Ligands                                             | 89.06              |
| <b>Model composition</b>                            |                    |
| Non-hydrogen atoms                                  | 8,452              |
| Protein residues                                    | 1,138              |
| R.m.s. deviations                                   |                    |
| Bond lengths (Å)                                    | 0.002 (0)          |
| Bond angles (°)                                     | 0.522(4)           |
| <b>Validation</b>                                   |                    |
| MolProbity score                                    | 1.58               |
| Clashscore                                          | 9.63               |
| Rotamer outliers (%)                                | 0.31               |
| Ramachandran plot                                   |                    |
| Favored (%)                                         | 97.68              |
| Allowed (%)                                         | 2.32               |
| Disallowed (%)                                      | 0                  |
| <b>Data availability</b>                            |                    |
| EMDB entry                                          | EMD-34549          |
| PDB entry                                           | 8H8J               |



**Table S2 Allosteric effects of divalent cations on ligands for GPR35 mutants.** NanoBiT assay was performed to evaluate the effects of divalent cations on the G protein recruitment of GPR35 and 5-HT<sub>1A</sub> in the presence of Iodexamide and 5-HT, respectively. The physiological concentrations of Co<sup>2+</sup>, Zn<sup>2+</sup>, Cu<sup>2+</sup>, and Fe<sup>3+</sup> are much lower than that of Mg<sup>2+</sup> and Ca<sup>2+</sup> (WHO Vitamin and Mineral Nutrition Information System, VMNIS). The maximum cell safety concentrations of these cations under our experimental conditions were used. Data are presented as means  $\pm$  S.E.M. of three independent experiments (n=3). All data were analyzed by two-side, one-way ANOVA with Tukey's test. \*\*\**P* < 0.001 vs. control.

| <b>Divalent Cations</b>      | <b>GPR35</b>                         |                                     | <b>5-HT<sub>1A</sub></b>       |
|------------------------------|--------------------------------------|-------------------------------------|--------------------------------|
|                              | <i>pEC<sub>50</sub></i> (Iodexamide) | <i>pEC<sub>50</sub></i> (zaprinast) | <i>pEC<sub>50</sub></i> (5-HT) |
| Control                      | 6.55 $\pm$ 0.02                      | 5.88 $\pm$ 0.05                     | 7.63 $\pm$ 0.02                |
| 10 mM Mg <sup>2+</sup>       | 6.99 $\pm$ 0.05***                   | /                                   | /                              |
| 100 mM Mg <sup>2+</sup>      | 7.09 $\pm$ 0.12***                   | 6.44 $\pm$ 0.03**                   | 7.39 $\pm$ 0.12                |
| 10 mM Ca <sup>2+</sup>       | 7.22 $\pm$ 0.15***                   | /                                   | /                              |
| 100 mM Ca <sup>2+</sup>      | 7.16 $\pm$ 0.16***                   | 7.53 $\pm$ 0.18***                  | 7.71 $\pm$ 0.18                |
| 1 mM Mn <sup>2+</sup>        | 6.94 $\pm$ 0.09***                   | /                                   | /                              |
| 10 mM Mn <sup>2+</sup>       | 7.44 $\pm$ 0.03***                   | 6.56 $\pm$ 0.04**                   | 7.62 $\pm$ 0.11                |
| 1 $\mu$ M Co <sup>2+</sup>   | 6.55 $\pm$ 0.02                      | /                                   | /                              |
| 1 $\mu$ M Zn <sup>2+</sup>   | 6.46 $\pm$ 0.04                      | /                                   | /                              |
| 0.1 $\mu$ M Cu <sup>2+</sup> | 6.48 $\pm$ 0.05                      | /                                   | /                              |
| 10 mM K <sup>+</sup>         | 6.52 $\pm$ 0.03                      | /                                   | /                              |
| 100 mM K <sup>+</sup>        | 6.55 $\pm$ 0.02                      | /                                   | /                              |
| 10 mM Li <sup>+</sup>        | 6.53 $\pm$ 0.04                      | /                                   | /                              |
| 100 mM Li <sup>+</sup>       | 6.59 $\pm$ 0.07                      | /                                   | /                              |
| 100 $\mu$ M Fe <sup>3+</sup> | 6.56 $\pm$ 0.08                      | /                                   | /                              |

**Table S3 Effects of Iodexamide on GPR35 mutants.** NanoBiT assay was performed to evaluate the effects of Iodexamide on  $\beta$ -arrestin 2 or G protein recruitment of GPR35. The surface expression of each GPR35 mutant was normalized to wild-type (WT) receptor, which was set to 100%. Data are presented as means  $\pm$  S.E.M. of three independent experiments (n=3). All data were analyzed by two-side, one-way ANOVA with Tukey's test. \* $P$  < 0.05, \*\* $P$  < 0.01, \*\*\* $P$  < 0.001, vs. WT receptor. U.D., undetectable.

| GPR35 Mutants  | G protein recruitment   | Surface Expression (%WT) |
|----------------|-------------------------|--------------------------|
|                | $pEC_{50}$ (Iodexamide) |                          |
| WT             | 6.02 $\pm$ 0.04         | 100                      |
| V76A           | < 5.00 $\pm$ 0.00       | 50.57 $\pm$ 1.91         |
| L80A           | 5.07 $\pm$ 0.16**       | 75.15 $\pm$ 3.62         |
| Y96A           | U.D.                    | 65.52 $\pm$ 5.16         |
| R100A          | U.D.                    | 147.03 $\pm$ 12.54       |
| F163A          | U.D.                    | 154.82 $\pm$ 8.23        |
| R240A          | 5.15 $\pm$ 0.18**       | 122.99 $\pm$ 2.42        |
| F45A/M49A/M59A | U.D.                    | 164.90 $\pm$ 8.11        |
| R114A          | 6.03 $\pm$ 0.14         | 77.12 $\pm$ 4.12         |
| V118A          | 5.74 $\pm$ 0.13         | 89.74 $\pm$ 2.00         |
| R125A          | U.D.                    | 111.26 $\pm$ 6.30        |
| R201A          | 5.74 $\pm$ 0.28*        | 76.86 $\pm$ 3.59         |
| V219A          | 6.06 $\pm$ 0.08         | 118.25 $\pm$ 4.94        |
| S265G          | U.D.                    | 170.67 $\pm$ 3.20        |
| S265F          | U.D.                    | 169.29 $\pm$ 7.48        |

**Table S4 Effects of Iodoxamide on  $G\alpha_{13}$  mutants.** NanoBiT assay was performed to evaluate the effects of Iodoxamide on  $G\alpha_{13}$  mutants recruitment by GPR35. Data are presented as means  $\pm$  S.E.M. of three independent experiments (n=3). All data were analyzed by two-side, one-way ANOVA with Tukey's test. \* $P < 0.05$ , \*\* $P < 0.01$ , \*\*\* $P < 0.001$ , vs. WT  $G\alpha_{13}$  subunit. U.D., undetectable.

| <b><math>G\alpha_{13}</math> Mutants</b> | <b><math>pEC_{50}</math></b> |
|------------------------------------------|------------------------------|
| WT                                       | 6.36 $\pm$ 0.03              |
| D364A                                    | 6.03 $\pm$ 0.10*             |
| N370A                                    | 5.97 $\pm$ 0.07*             |
| L371A                                    | U.D.                         |
| L374A                                    | 5.67 $\pm$ 0.08***           |
| M375A                                    | 5.66 $\pm$ 0.06***           |
| M375K                                    | 5.44 $\pm$ 0.22***           |
| M375R                                    | 5.79 $\pm$ 0.13**            |
| L376A                                    | U.D.                         |
